# Supplementary material for: Dysregulation of Metabolism and Proteostasis in Skeletal Muscle of a Presymptomatic Pompe Mouse Model
Source: MDPI journal article supplement (doi:10.3390/cells12121602), 2023-06-11
Supplement: s1 [file s1]

# Supplementary Materials

Table S1: Overview of dysregulated proteins found in six-weeks-old Pompe mice quadriceps muscle

| UniProt-AC | FC   | P-Val | UniProt-AC | FC   | P-Val | UniProt-AC | FC   | P-Val |
|------------|------|-------|------------|------|-------|------------|------|-------|
| P16858     | 1.08 | 0.01  | P35979     | 1.32 | 0.01  | Q9Z1E4     | 1.38 | 0.00  |
| P09411     | 1.09 | 0.01  | P11404     | 1.32 | 0.00  | P62192     | 1.38 | 0.03  |
| P28650     | 1.15 | 0.03  | Q3THW5     | 1.32 | 0.01  | Q9Z2U0     | 1.39 | 0.00  |
| P52480     | 1.18 | 0.05  | Q9D6R2     | 1.32 | 0.02  | P08030     | 1.39 | 0.02  |
| Q01768     | 1.19 | 0.02  | P53810     | 1.33 | 0.02  | Q9D855     | 1.39 | 0.01  |
| Q64521     | 1.20 | 0.04  | P62806     | 1.33 | 0.01  | Q8K3J1     | 1.39 | 0.02  |
| P62911     | 1.20 | 0.04  | P62259     | 1.33 | 0.01  | P60867     | 1.39 | 0.02  |
| P15864     | 1.21 | 0.02  | P97807     | 1.33 | 0.01  | P48774     | 1.39 | 0.01  |
| Q6ZQ73     | 1.22 | 0.01  | Q62000     | 1.33 | 0.04  | Q9CRB6     | 1.39 | 0.05  |
| P56375     | 1.22 | 0.01  | P56135     | 1.33 | 0.04  | Q91VM9     | 1.39 | 0.04  |
| Q3MI48     | 1.22 | 0.01  | P45377     | 1.33 | 0.02  | Q9DCJ5     | 1.39 | 0.00  |
| Q9QZQ8     | 1.23 | 0.01  | Q922J3     | 1.34 | 0.01  | P62281     | 1.39 | 0.03  |
| P32848     | 1.24 | 0.01  | P63323     | 1.34 | 0.01  | P62852     | 1.39 | 0.01  |
| P80318     | 1.24 | 0.05  | P63017     | 1.34 | 0.02  | O09061     | 1.39 | 0.01  |
| Q9D2G2     | 1.24 | 0.02  | Q9CR68     | 1.34 | 0.02  | Q9DCS9     | 1.40 | 0.01  |
| Q9CQ69     | 1.24 | 0.04  | Q99JY0     | 1.34 | 0.02  | Q9CQZ5     | 1.40 | 0.00  |
| Q6P1F6     | 1.25 | 0.02  | Q91VD9     | 1.34 | 0.00  | Q8K1Z0     | 1.40 | 0.04  |
| P52503     | 1.25 | 0.03  | Q8QZT1     | 1.34 | 0.01  | A6X935     | 1.40 | 0.03  |
| P68037     | 1.25 | 0.01  | P14733     | 1.35 | 0.00  | Q60675     | 1.40 | 0.02  |
| Q9CZU6     | 1.25 | 0.01  | P51881     | 1.35 | 0.00  | Q3U1J4     | 1.40 | 0.00  |
| P70670     | 1.26 | 0.02  | Q8R3G9     | 1.35 | 0.02  | Q06185     | 1.40 | 0.01  |
| Q9WTP6     | 1.26 | 0.05  | Q9Z1N5     | 1.35 | 0.00  | Q9CPQ8     | 1.40 | 0.00  |
| Q9WUM5     | 1.26 | 0.00  | Q6ZWV7     | 1.36 | 0.03  | P02463     | 1.40 | 0.02  |
| Q9D0M5     | 1.26 | 0.04  | P35486     | 1.36 | 0.00  | P48678     | 1.40 | 0.01  |
| Q76MZ3     | 1.27 | 0.03  | O88456     | 1.36 | 0.02  | P45591     | 1.41 | 0.01  |
| Q9D8N0     | 1.27 | 0.02  | P55264     | 1.36 | 0.04  | Q9DB20     | 1.41 | 0.00  |
| Q60931     | 1.28 | 0.04  | P19253     | 1.36 | 0.00  | P67778     | 1.41 | 0.01  |
| O55126     | 1.28 | 0.00  | Q9CXV1     | 1.36 | 0.03  | P12815     | 1.41 | 0.03  |
| Q99KI0     | 1.29 | 0.03  | Q9JJV2     | 1.36 | 0.02  | Q9D0M3     | 1.41 | 0.00  |
| Q9D3D9     | 1.29 | 0.01  | Q9CQ62     | 1.37 | 0.03  | P25444     | 1.41 | 0.02  |
| P63328     | 1.29 | 0.04  | Q6ZWY3     | 1.37 | 0.05  | Q99020     | 1.41 | 0.02  |
| O08749     | 1.29 | 0.00  | Q9DCX2     | 1.37 | 0.01  | P62827     | 1.41 | 0.01  |
| P08249     | 1.29 | 0.03  | Q7TMF3     | 1.37 | 0.01  | P50544     | 1.41 | 0.02  |
| P68040     | 1.29 | 0.03  | Q924X2     | 1.38 | 0.02  | P10493     | 1.42 | 0.00  |
| P63001     | 1.30 | 0.05  | Q61584     | 1.38 | 0.03  | O88712     | 1.42 | 0.03  |
| P47963     | 1.30 | 0.05  | P48962     | 1.38 | 0.04  | O35350     | 1.42 | 0.00  |
| Q9CPQ1     | 1.31 | 0.04  | P19783     | 1.38 | 0.02  | P62897     | 1.42 | 0.01  |
| Q9CQC7     | 1.31 | 0.02  | P97351     | 1.38 | 0.01  | Q03265     | 1.42 | 0.00  |
| Q6NT99     | 1.32 | 0.04  | Q70IV5     | 1.38 | 0.01  | P35980     | 1.42 | 0.02  |

| UniProt-AC | FC   | P-Val | UniProt-AC | FC   | P-Val | UniProt-AC | FC   | P-Val |
|------------|------|-------|------------|------|-------|------------|------|-------|
| Q9Z2I9     | 1.42 | 0.01  | P47962     | 1.46 | 0.03  | Q9CQQ7     | 1.52 | 0.03  |
| Q3U962     | 1.42 | 0.05  | O55234     | 1.46 | 0.00  | Q922B2     | 1.52 | 0.02  |
| Q8BG32     | 1.42 | 0.04  | Q6ZWV3     | 1.47 | 0.01  | P05201     | 1.52 | 0.02  |
| P14131     | 1.42 | 0.00  | Q9CQR4     | 1.47 | 0.02  | Q99LY9     | 1.52 | 0.01  |
| O54724     | 1.42 | 0.01  | Q9D8B4     | 1.47 | 0.03  | Q61171     | 1.52 | 0.00  |
| Q61425     | 1.42 | 0.00  | Q9Z1P6     | 1.47 | 0.02  | P62900     | 1.52 | 0.01  |
| P62702     | 1.42 | 0.02  | P11499     | 1.47 | 0.04  | P62082     | 1.53 | 0.01  |
| P61358     | 1.43 | 0.01  | O08709     | 1.47 | 0.00  | O70251     | 1.53 | 0.04  |
| Q9DB77     | 1.43 | 0.00  | Q8R404     | 1.47 | 0.00  | P22599     | 1.53 | 0.03  |
| Q9CQ75     | 1.43 | 0.01  | P00405     | 1.47 | 0.00  | Q9D967     | 1.53 | 0.03  |
| P48758     | 1.43 | 0.02  | O70435     | 1.47 | 0.00  | Q8VEK3     | 1.53 | 0.02  |
| Q8R127     | 1.43 | 0.05  | A2AUC9     | 1.47 | 0.03  | Q9JI91     | 1.53 | 0.02  |
| Q8BMF4     | 1.43 | 0.00  | Q9D051     | 1.47 | 0.00  | Q9CYT6     | 1.53 | 0.00  |
| Q8BH59     | 1.43 | 0.00  | Q6ZWX6     | 1.47 | 0.01  | Q60597     | 1.53 | 0.00  |
| Q9D0I9     | 1.43 | 0.00  | P17742     | 1.48 | 0.01  | P35282     | 1.54 | 0.04  |
| Q8R1I1     | 1.43 | 0.05  | P62889     | 1.49 | 0.01  | Q04857     | 1.54 | 0.05  |
| Q9CQA3     | 1.43 | 0.00  | Q9D8E6     | 1.49 | 0.01  | P09671     | 1.54 | 0.00  |
| P53026     | 1.43 | 0.01  | Q9D2M8     | 1.49 | 0.02  | P02469     | 1.54 | 0.00  |
| P62245     | 1.44 | 0.00  | Q8VEM8     | 1.49 | 0.01  | Q3TL44     | 1.54 | 0.01  |
| P20029     | 1.44 | 0.00  | Q99MQ4     | 1.49 | 0.02  | P62754     | 1.54 | 0.04  |
| P62717     | 1.44 | 0.01  | Q91YT0     | 1.49 | 0.00  | P67984     | 1.54 | 0.01  |
| P56391     | 1.44 | 0.00  | Q8CGY6     | 1.49 | 0.00  | Q9D7X3     | 1.54 | 0.00  |
| Q99L13     | 1.44 | 0.01  | P31001     | 1.49 | 0.01  | Q8BGH2     | 1.55 | 0.02  |
| Q11011     | 1.44 | 0.04  | P61979     | 1.49 | 0.02  | P51410     | 1.55 | 0.00  |
| Q9ERS2     | 1.44 | 0.01  | Q61292     | 1.50 | 0.01  | P62242     | 1.56 | 0.00  |
| P63038     | 1.44 | 0.01  | Q60930     | 1.50 | 0.00  | Q7TMK9     | 1.56 | 0.02  |
| Q91WS0     | 1.44 | 0.01  | Q9CR61     | 1.50 | 0.03  | P05202     | 1.56 | 0.01  |
| P53994     | 1.44 | 0.03  | P56480     | 1.50 | 0.00  | P62830     | 1.57 | 0.02  |
| Q9WU78     | 1.44 | 0.00  | P70195     | 1.50 | 0.01  | Q9CQJ8     | 1.57 | 0.00  |
| P14115     | 1.45 | 0.04  | P13020     | 1.50 | 0.02  | Q64310     | 1.57 | 0.00  |
| Q9Z2U1     | 1.45 | 0.01  | Q99JB8     | 1.50 | 0.00  | Q78IK2     | 1.57 | 0.01  |
| Q9CZ13     | 1.45 | 0.00  | Q9R1P4     | 1.51 | 0.01  | Q93092     | 1.58 | 0.04  |
| P61255     | 1.45 | 0.02  | Q8CAQ8     | 1.51 | 0.00  | Q9D1M0     | 1.58 | 0.04  |
| Q6ZWN5     | 1.45 | 0.00  | Q8CGK3     | 1.51 | 0.01  | P42932     | 1.58 | 0.02  |
| Q60668     | 1.45 | 0.03  | Q9CZX8     | 1.51 | 0.01  | Q9D0R2     | 1.58 | 0.02  |
| P70333     | 1.45 | 0.02  | P62908     | 1.51 | 0.00  | P51885     | 1.58 | 0.01  |
| P07724     | 1.46 | 0.04  | Q01853     | 1.51 | 0.00  | P54071     | 1.58 | 0.01  |
| P99029     | 1.46 | 0.00  | Q64105     | 1.51 | 0.02  | Q9CWJ9     | 1.58 | 0.01  |
| P62751     | 1.46 | 0.04  | P14148     | 1.51 | 0.00  | Q68FD5     | 1.59 | 0.00  |
| P08122     | 1.46 | 0.02  | Q91WD5     | 1.51 | 0.02  | O08756     | 1.60 | 0.03  |
| Q9ES74     | 1.46 | 0.01  | P46471     | 1.52 | 0.00  | P14824     | 1.60 | 0.00  |
| P26443     | 1.46 | 0.00  | Q8K2B3     | 1.52 | 0.00  | P11531     | 1.61 | 0.00  |
| O08539     | 1.46 | 0.00  | Q9DC69     | 1.52 | 0.00  | P45952     | 1.61 | 0.00  |

| UniProt-AC | FC   | P-Val | UniProt-AC | FC   | P-Val | UniProt-AC | FC   | P-Val |
|------------|------|-------|------------|------|-------|------------|------|-------|
| O35206     | 1.61 | 0.00  | Q921G7     | 1.67 | 0.04  | Q9D1G1     | 1.78 | 0.04  |
| P63085     | 1.61 | 0.03  | Q9CRB9     | 1.67 | 0.01  | Q8BZA9     | 1.78 | 0.00  |
| Q9CPR4     | 1.61 | 0.00  | Q3TEA8     | 1.67 | 0.01  | P62334     | 1.79 | 0.01  |
| Q9DCZ1     | 1.61 | 0.01  | O08528     | 1.68 | 0.00  | P68369     | 1.79 | 0.00  |
| Q61554     | 1.61 | 0.02  | Q61598     | 1.68 | 0.01  | P00158     | 1.79 | 0.02  |
| P46638     | 1.61 | 0.00  | Q9CQH3     | 1.68 | 0.01  | P68368     | 1.79 | 0.00  |
| P21812     | 1.62 | 0.02  | Q9D8W5     | 1.68 | 0.02  | P32020     | 1.79 | 0.03  |
| Q61234     | 1.62 | 0.02  | P62855     | 1.69 | 0.02  | P23953     | 1.79 | 0.04  |
| Q9CQE8     | 1.62 | 0.04  | P07901     | 1.69 | 0.01  | Q9DB73     | 1.80 | 0.03  |
| O35129     | 1.62 | 0.00  | P09405     | 1.70 | 0.01  | Q99PT1     | 1.80 | 0.02  |
| P60335     | 1.62 | 0.00  | Q9CPP6     | 1.70 | 0.00  | Q922F4     | 1.80 | 0.04  |
| P14869     | 1.62 | 0.00  | Q9QZZ6     | 1.70 | 0.01  | Q99MN9     | 1.81 | 0.03  |
| Q99MR9     | 1.63 | 0.04  | Q791V5     | 1.71 | 0.00  | Q9DB60     | 1.81 | 0.01  |
| Q9CR62     | 1.63 | 0.02  | Q99MN1     | 1.71 | 0.05  | Q8BG05     | 1.81 | 0.00  |
| P84104     | 1.63 | 0.02  | P01027     | 1.71 | 0.03  | P63101     | 1.82 | 0.00  |
| P62880     | 1.63 | 0.02  | Q9JM76     | 1.71 | 0.04  | P27546     | 1.82 | 0.04  |
| Q9CR09     | 1.63 | 0.05  | P16546     | 1.71 | 0.02  | P82348     | 1.82 | 0.03  |
| Q9CXS4     | 1.64 | 0.01  | Q8BFZ3     | 1.71 | 0.01  | P09055     | 1.82 | 0.00  |
| P07356     | 1.64 | 0.00  | P97384     | 1.72 | 0.01  | O35344     | 1.84 | 0.03  |
| P47911     | 1.64 | 0.01  | O08638     | 1.72 | 0.03  | P61161     | 1.84 | 0.03  |
| O35864     | 1.64 | 0.03  | P09528     | 1.72 | 0.01  | Q9CZM2     | 1.85 | 0.01  |
| Q9JK92     | 1.64 | 0.00  | P21981     | 1.73 | 0.04  | P99026     | 1.85 | 0.01  |
| Q9D6U8     | 1.64 | 0.01  | P14685     | 1.73 | 0.00  | Q8K4Z3     | 1.86 | 0.00  |
| Q8BFR5     | 1.64 | 0.00  | Q99L47     | 1.73 | 0.01  | Q9DBP5     | 1.86 | 0.02  |
| P38647     | 1.64 | 0.00  | O55142     | 1.73 | 0.03  | Q9DCW4     | 1.86 | 0.03  |
| Q9WVJ2     | 1.65 | 0.01  | Q9QWL7     | 1.73 | 0.01  | O08677     | 1.86 | 0.03  |
| Q05793     | 1.65 | 0.03  | P97355     | 1.74 | 0.01  | Q8VDM4     | 1.87 | 0.00  |
| Q08857     | 1.65 | 0.02  | P48036     | 1.74 | 0.03  | Q61699     | 1.87 | 0.02  |
| P56695     | 1.65 | 0.02  | Q6IRU5     | 1.74 | 0.01  | Q99JI4     | 1.87 | 0.00  |
| Q8BKC5     | 1.65 | 0.02  | O55222     | 1.74 | 0.03  | Q6P8J7     | 1.87 | 0.01  |
| P03921     | 1.65 | 0.04  | Q8BWT1     | 1.75 | 0.01  | P54775     | 1.88 | 0.04  |
| Q66JS6     | 1.65 | 0.05  | P16045     | 1.75 | 0.02  | A2AMM0     | 1.88 | 0.01  |
| Q70KF4     | 1.65 | 0.02  | P82347     | 1.75 | 0.02  | Q9R0P5     | 1.89 | 0.00  |
| Q9Z2Z6     | 1.66 | 0.02  | Q9D0K2     | 1.75 | 0.01  | P10639     | 1.89 | 0.02  |
| Q99LC3     | 1.66 | 0.01  | P62196     | 1.75 | 0.03  | O35459     | 1.90 | 0.01  |
| Q99KB8     | 1.66 | 0.02  | Q8CDN6     | 1.75 | 0.02  | P51174     | 1.90 | 0.00  |
| P47934     | 1.66 | 0.00  | P15089     | 1.76 | 0.02  | O35658     | 1.90 | 0.01  |
| P62983     | 1.66 | 0.01  | P42669     | 1.76 | 0.05  | P47955     | 1.90 | 0.03  |
| Q3UIU2     | 1.66 | 0.02  | O70325     | 1.76 | 0.05  | Q6PER3     | 1.91 | 0.02  |
| Q3TC72     | 1.66 | 0.02  | P41216     | 1.76 | 0.00  | O08553     | 1.91 | 0.01  |
| Q9CZB0     | 1.66 | 0.02  | Q8C7E7     | 1.77 | 0.02  | Q91WK5     | 1.91 | 0.03  |
| P62301     | 1.67 | 0.03  | P42125     | 1.77 | 0.02  | Q00896     | 1.92 | 0.02  |
| Q9R0Q7     | 1.67 | 0.02  | P16015     | 1.77 | 0.00  | O88545     | 1.94 | 0.01  |

| UniProt-AC | FC   | P-Val | UniProt-AC | FC   | P-Val | UniProt-AC | FC   | P-Val |
|------------|------|-------|------------|------|-------|------------|------|-------|
| Q9JMA1     | 1.94 | 0.01  | O35855     | 2.14 | 0.02  | P62960     | 2.45 | 0.02  |
| P60710     | 1.94 | 0.01  | P54923     | 2.14 | 0.03  | Q9DB05     | 2.46 | 0.02  |
| Q922R8     | 1.95 | 0.03  | P61961     | 2.15 | 0.04  | Q91V41     | 2.49 | 0.00  |
| Q9CPU4     | 1.95 | 0.03  | Q7TNG5     | 2.15 | 0.03  | Q9WVA4     | 2.52 | 0.03  |
| P51150     | 1.95 | 0.00  | P10605     | 2.15 | 0.01  | Q9ESL4     | 2.52 | 0.04  |
| P08113     | 1.95 | 0.02  | Q62165     | 2.15 | 0.03  | Q99JY9     | 2.54 | 0.00  |
| Q9CYR0     | 1.96 | 0.03  | Q9JHU4     | 2.17 | 0.00  | P60843     | 2.55 | 0.00  |
| Q5SX40     | 1.96 | 0.02  | Q9D783     | 2.17 | 0.00  | Q91W90     | 2.58 | 0.03  |
| Q9R1P1     | 1.97 | 0.02  | Q78IK4     | 2.17 | 0.02  | Q61696     | 2.62 | 0.01  |
| P63073     | 1.97 | 0.00  | P19157     | 2.19 | 0.01  | Q61838     | 2.64 | 0.00  |
| P02535     | 1.99 | 0.02  | P70398     | 2.20 | 0.02  | Q62009     | 2.66 | 0.02  |
| P22315     | 1.99 | 0.03  | P63094     | 2.20 | 0.00  | Q9D020     | 2.67 | 0.00  |
| P21614     | 1.99 | 0.01  | Q6PHZ2     | 2.20 | 0.00  | P32921     | 2.67 | 0.01  |
| Q9JI75     | 2.00 | 0.01  | Q9QZ06     | 2.20 | 0.01  | P50396     | 2.67 | 0.00  |
| P50580     | 2.00 | 0.01  | Q8BTM8     | 2.23 | 0.00  | Q9CYZ2     | 2.67 | 0.04  |
| Q9WVH9     | 2.00 | 0.02  | Q3ULJ0     | 2.24 | 0.01  | P82349     | 2.69 | 0.02  |
| Q05816     | 2.01 | 0.01  | Q8VHX6     | 2.25 | 0.00  | Q80X19     | 2.69 | 0.03  |
| Q9QWV4     | 2.02 | 0.03  | P62849     | 2.25 | 0.00  | Q9QZF2     | 2.72 | 0.00  |
| Q62261     | 2.02 | 0.02  | Q922Q8     | 2.26 | 0.03  | P14602     | 2.72 | 0.00  |
| Q5DTJ9     | 2.02 | 0.01  | P27573     | 2.29 | 0.04  | P99024     | 2.81 | 0.04  |
| Q9DB27     | 2.03 | 0.03  | P57780     | 2.30 | 0.00  | Q9DBC7     | 2.81 | 0.00  |
| P59999     | 2.04 | 0.00  | Q9CVB6     | 2.30 | 0.01  | Q6NTA4     | 2.82 | 0.02  |
| P26041     | 2.04 | 0.05  | Q08642     | 2.30 | 0.04  | Q9R0X4     | 2.83 | 0.03  |
| O70209     | 2.05 | 0.00  | P63321     | 2.31 | 0.03  | Q9EQU5     | 2.85 | 0.03  |
| Q3THE2     | 2.05 | 0.01  | Q8CIB5     | 2.32 | 0.02  | Q99KC8     | 2.85 | 0.01  |
| Q9R062     | 2.06 | 0.00  | Q8C0C7     | 2.32 | 0.00  | Q9D1H9     | 2.87 | 0.02  |
| Q8R4N0     | 2.06 | 0.02  | Q5M8N4     | 2.33 | 0.02  | P97447     | 2.88 | 0.01  |
| Q60631     | 2.07 | 0.00  | Q78ZA7     | 2.34 | 0.03  | O70492     | 2.88 | 0.01  |
| Q9DCD0     | 2.07 | 0.04  | P35762     | 2.34 | 0.01  | P62962     | 2.89 | 0.00  |
| P62835     | 2.08 | 0.00  | Q9CY50     | 2.35 | 0.01  | Q9DCN2     | 2.91 | 0.00  |
| P35293     | 2.08 | 0.00  | Q9JJZ2     | 2.35 | 0.00  | Q9QUM9     | 2.92 | 0.01  |
| Q01339     | 2.08 | 0.01  | P84091     | 2.37 | 0.04  | P62137     | 2.94 | 0.02  |
| E9PV24     | 2.09 | 0.03  | Q99KQ4     | 2.38 | 0.00  | Q7TMM9     | 2.95 | 0.00  |
| P47811     | 2.10 | 0.02  | Q9CQN1     | 2.38 | 0.00  | O55131     | 2.95 | 0.02  |
| Q91ZJ5     | 2.10 | 0.00  | Q8K1M6     | 2.40 | 0.00  | Q9QXT0     | 2.98 | 0.00  |
| O08529     | 2.10 | 0.01  | Q9JMH6     | 2.40 | 0.01  | Q6P9Q4     | 2.98 | 0.01  |
| Q9DCS3     | 2.11 | 0.01  | P80316     | 2.40 | 0.04  | Q9EQP2     | 2.98 | 0.00  |
| Q920M5     | 2.12 | 0.03  | P47753     | 2.41 | 0.01  | P16110     | 3.02 | 0.03  |
| Q8BJY1     | 2.13 | 0.05  | Q8BWM0     | 2.41 | 0.03  | Q91VI7     | 3.15 | 0.00  |
| P10126     | 2.13 | 0.05  | P17427     | 2.43 | 0.03  | Q8BH61     | 3.15 | 0.01  |
| Q8C6K9     | 2.14 | 0.05  | P24472     | 2.43 | 0.01  | P97429     | 3.17 | 0.01  |
| Q9R1P0     | 2.14 | 0.03  | Q9WVK4     | 2.43 | 0.05  | P13745     | 3.21 | 0.02  |
| Q61166     | 2.14 | 0.03  | P11352     | 2.45 | 0.03  | Q8BW75     | 3.22 | 0.03  |

| UniProt-<br>AC | FC   | P-Val | UniProt-<br>AC | FC    | P-Val | UniProt-<br>AC | FC   | P-Val |
|----------------|------|-------|----------------|-------|-------|----------------|------|-------|
| P24452         | 3.25 | 0.00  | Q64669         | 4.05  | 0.01  | Q8BU85         | 0.57 | 0.02  |
| Q9R0P3         | 3.25 | 0.00  | Q61147         | 4.11  | 0.02  | Q3V1D3         | 0.64 | 0.00  |
| P63276         | 3.26 | 0.00  | Q5EBG6         | 4.13  | 0.01  | Q8BGQ7         | 0.66 | 0.03  |
| Q61656         | 3.26 | 0.01  | P70168         | 5.35  | 0.01  | P63268         | 0.68 | 0.01  |
| Q5FW52         | 3.28 | 0.00  | Q60854         | 6.07  | 0.00  | Q8C494         | 0.75 | 0.00  |
| P10637         | 3.33 | 0.01  | P23927         | 6.22  | 0.00  | Q8VCR8         | 0.76 | 0.00  |
| P28656         | 3.38 | 0.02  | Q9D832         | 6.36  | 0.04  | Q9DCL9         | 0.81 | 0.01  |
| P59325         | 3.41 | 0.00  | Q8VDC1         | 6.38  | 0.04  | P56382         | 0.81 | 0.03  |
| Q9DBS1         | 3.45 | 0.00  | Q80XB4         | 6.88  | 0.00  | P11247         | 0.82 | 0.03  |
| Q9JHR7         | 3.48 | 0.00  | Q8VEE1         | 7.53  | 0.00  | Q5XKE0         | 0.82 | 0.01  |
| P42208         | 3.54 | 0.02  | P97425         | 7.66  | 0.00  | P58771         | 0.84 | 0.01  |
| Q07076         | 3.56 | 0.00  | Q9DCS2         | 7.67  | 0.04  | O88990         | 0.87 | 0.02  |
| P24270         | 3.64 | 0.02  | Q9CQ22         | 8.34  | 0.00  | Q5SX39         | 0.88 | 0.00  |
| O54950         | 3.71 | 0.00  | Q9D6Y9         | 8.63  | 0.00  | Q91YE8         | 0.88 | 0.02  |
| Q9CQW2         | 3.77 | 0.00  | Q61878         | 8.96  | 0.00  | Q8R429         | 0.88 | 0.00  |
| Q921F2         | 3.87 | 0.05  | Q99JI1         | 9.36  | 0.01  | A2ASS6         | 0.91 | 0.01  |
| Q9EQH3         | 3.91 | 0.00  | P35385         | 26.08 | 0.00  |                |      |       |

Table S2: Significant upregulated Proteins overlapping with KEGG “pathway of neurodegeneration – multiple diseases”

| UniProt Accession | Gene Name | fc   | p-value | UniProt Accession | Gene Name | fc   | p-value |
|-------------------|-----------|------|---------|-------------------|-----------|------|---------|
| Q9CQQ7            | Atp5pb    | 1.52 | 0.0283  | P63085            | Mapk1     | 1.61 | 0.0317  |
| P56480            | Atp5f1b   | 1.50 | 0.0048  | P47811            | Mapk14    | 2.10 | 0.0164  |
| Q9DCX2            | Atp5pd    | 1.37 | 0.0070  | P62192            | Psmc1     | 1.38 | 0.0277  |
| Q9DB20            | Atp5po    | 1.41 | 0.0049  | P62196            | Psmc5     | 1.75 | 0.0272  |
| Q03265            | Atp5f1a   | 1.42 | 0.0011  | P46471            | Psmc2     | 1.52 | 0.0041  |
| Q9D3D9            | Atp5f1d   | 1.29 | 0.0123  | P54775            | Psmc4     | 1.88 | 0.0362  |
| P03921            | Mtnd5     | 1.65 | 0.0353  | P62334            | Psmc6     | 1.79 | 0.0097  |
| Q91VD9            | Ndufs1    | 1.34 | 0.0037  | Q8BG32            | Psmd11    | 1.42 | 0.0447  |
| Q91WD5            | Ndufs2    | 1.51 | 0.0229  | Q9D8W5            | Psmd12    | 1.68 | 0.0158  |
| Q99LY9            | Ndufs5    | 1.52 | 0.0139  | Q9WVJ2            | Psmd13    | 1.65 | 0.0055  |
| P52503            | Ndufs6    | 1.25 | 0.0299  | Q8VDM4            | Psmd2     | 1.87 | 0.0019  |
| Q8K3J1            | Ndufs8    | 1.39 | 0.0166  | P14685            | Psmd3     | 1.73 | 0.0006  |
| Q91YT0            | Ndufv1    | 1.49 | 0.0046  | Q99JI4            | Psmd6     | 1.87 | 0.0003  |
| Q99LC3            | Ndufa10   | 1.66 | 0.0074  | O09061            | Psmb1     | 1.39 | 0.0092  |
| Q9D8B4            | Ndufa11   | 1.47 | 0.0338  | Q9R1P1            | Psmb3     | 1.97 | 0.0170  |
| Q7TMF3            | Ndufa12   | 1.37 | 0.0116  | P99026            | Psmb4     | 1.85 | 0.0143  |
| Q9ERS2            | Ndufa13   | 1.44 | 0.0075  | O55234            | Psmb5     | 1.46 | 0.0026  |
| Q9CQ75            | Ndufa2    | 1.43 | 0.0141  | P70195            | Psmb7     | 1.50 | 0.0103  |
| Q9CPP6            | Ndufa5    | 1.70 | 0.0015  | Q9R1P4            | Psma1     | 1.51 | 0.0065  |
| Q9CQZ5            | Ndufa6    | 1.40 | 0.0044  | O70435            | Psma3     | 1.47 | 0.0014  |
| Q9Z1P6            | Ndufa7    | 1.47 | 0.0212  | Q9R1P0            | Psma4     | 2.14 | 0.0322  |
| Q9DCJ5            | Ndufa8    | 1.39 | 0.0008  | Q9Z2U1            | Psma5     | 1.45 | 0.0105  |
| Q9DC69            | Ndufa9    | 1.52 | 0.0019  | Q9QUM9            | Psma6     | 2.92 | 0.0061  |
| Q9DCS9            | Ndufb10   | 1.40 | 0.0054  | Q9Z2U0            | Psma7     | 1.39 | 0.0045  |
| Q9CQC7            | Ndufb4    | 1.31 | 0.0180  | P63328            | Ppp3ca    | 1.29 | 0.0386  |
| Q9CQH3            | Ndufb5    | 1.68 | 0.0122  | P62983            | Rps27a    | 1.66 | 0.0086  |
| Q3UIU2            | Ndufb6    | 1.66 | 0.0202  | P48962            | Slc25a4   | 1.38 | 0.0378  |
| Q9CR61            | Ndufb7    | 1.50 | 0.0339  | P51881            | Slc25a5   | 1.35 | 0.0034  |
| Q9CQJ8            | Ndufb9    | 1.57 | 0.0002  | Q8K2B3            | Sdha      | 1.52 | 0.0001  |
| P63001            | Rac1      | 1.30 | 0.0482  | Q9CQA3            | Sdhb      | 1.43 | 0.0019  |
| Q921F2            | Tardbp    | 3.87 | 0.0488  | Q9CZB0            | Sdhc      | 1.66 | 0.0212  |
| Q9CQN1            | Trap1     | 2.38 | 0.0031  | Q9CXV1            | Sdhd      | 1.36 | 0.0287  |
| Q6PHZ2            | Camk2d    | 2.20 | 0.0003  | P68369            | Tuba1a    | 1.79 | 0.0023  |
| O35350            | Capn1     | 1.42 | 0.0049  | P68368            | Tuba4a    | 1.79 | 0.0000  |
| O08529            | Capn2     | 2.10 | 0.0074  | Q9JJZ2            | Tuba8     | 2.35 | 0.0007  |
| P24270            | Cat       | 3.64 | 0.0212  | Q7TMM9            | Tubb2a    | 2.95 | 0.0016  |
| P00158            | Mt-Cyb    | 1.79 | 0.0220  | P99024            | Tubb5     | 2.81 | 0.0436  |
| P00405            | Mtco2     | 1.47 | 0.0011  | Q922F4            | Tubb6     | 1.80 | 0.0376  |
| P19783            | Cox4i1    | 1.38 | 0.0231  | Q9DB77            | Uqcrc2    | 1.43 | 0.0009  |
| Q9CPQ1            | Cox6c     | 1.31 | 0.0352  | Q9D855            | Uqcrb     | 1.39 | 0.0059  |
| P56391            | Cox6b1    | 1.44 | 0.0036  | Q9CZ13            | Uqcrc1    | 1.45 | 0.0049  |
| P62897            | Cycs      | 1.42 | 0.0057  | Q9CR68            | Uqcrfs1   | 1.34 | 0.0226  |
| Q9D0M3            | Cyc1      | 1.41 | 0.0013  | Q9CQ69            | Uqcrq     | 1.24 | 0.0389  |
| Q6ZWX6            | Eif2s1    | 1.47 | 0.0055  | Q8R1I1            | Uqcr10    | 1.43 | 0.0465  |
| P11352            | Gpx1      | 2.45 | 0.0279  | P68037            | Ube2l3    | 1.25 | 0.0091  |
| P20029            | Hspa5     | 1.44 | 0.0027  | Q01853            | Vcp       | 1.51 | 0.0043  |
| O08756            | Hsd17b10  | 1.60 | 0.0261  | Q60930            | Vdac2     | 1.50 | 0.0007  |
| P10637            | Mapt      | 3.33 | 0.0052  | Q60931            | Vdac3     | 1.28 | 0.0412  |
